# Supplementary material for: Simultaneous Quantification of L-Arginine and Monosaccharides during Fermentation: An Advanced Chromatography Approach
Source: Molecules. 2019 Feb 22;24(4):802. doi: 10.3390/molecules24040802 (PMC6413082; doi:10.3390/molecules24040802)
Supplement: Supplementary file 1 [file molecules-24-00802-s001.pdf]

## Supplementary Materials

# Simultaneous Quantification of L-arginine and Monosaccharides during Fermentation: An Advanced Chromatography Approach

Mireille Ginésy <sup>1</sup>, Josefine Enman <sup>1\*</sup>, Daniela Rusanova-Naydenova <sup>1</sup>, and Ulrika Rova <sup>1</sup>

<sup>1</sup> Biochemical Process Engineering, Division of Chemical Engineering, Department of Civil, Environmental and Natural Resources Engineering, Luleå University of Technology, SE-971 87 Luleå, Sweden;  
mireille.ginesy@gmail.com, josefine.enman@ltu.se, droussanova@hotmail.com, ulrika.rova@ltu.se

\* Correspondence: josefine.enman@ltu.se; Tel +46- 920-49 12 67

**Table 1.** Evaluation of HPAEC-IPAD specificity based on comparing retention times in water ( $n = 3$ ).

| Glucose         |                                   | Xylose          |                                   | Arginine                |                                   |
|-----------------|-----------------------------------|-----------------|-----------------------------------|-------------------------|-----------------------------------|
| Conc.<br>(mg/L) | Ret. time (min)<br>Mean $\pm$ Std | Conc.<br>(mg/L) | Ret. time (min)<br>Mean $\pm$ Std | Conc.<br>( $\mu$ mol/L) | Ret. time (min)<br>Mean $\pm$ Std |
| 0.125           | 7.23 $\pm$ 0.02                   | 0.125           | 7.50 $\pm$ 0.02                   | 0.50                    | 2.26 $\pm$ 0.01                   |
| 0.25            | 7.28 $\pm$ 0.02                   | 0.25            | 7.62 $\pm$ 0.04                   | 0.75                    | 2.26 $\pm$ na                     |
| 0.50            | 7.28 $\pm$ 0.02                   | 0.50            | 7.62 $\pm$ 0.02                   | 1.0                     | 2.26 $\pm$ 0.01                   |
| 1.00            | 7.29 $\pm$ 0.02                   | 1.00            | 7.61 $\pm$ 0.02                   | 1.5                     | 2.26 $\pm$ na                     |
| 2.00            | 7.28 $\pm$ 0.01                   | 2.00            | 7.61 $\pm$ 0.02                   | 3.0                     | 2.26 $\pm$ na                     |
| 4.00            | 7.29 $\pm$ 0.03                   | 4.00            | 7.61 $\pm$ 0.02                   | 5.0                     | 2.26 $\pm$ na                     |
| 6.00            | 7.29 $\pm$ 0.02                   | 6.00            | 7.61 $\pm$ na                     | 7.5                     | 2.26 $\pm$ 0.01                   |
| 8.00            | 7.29 $\pm$ 0.02                   | 8.00            | 7.62 $\pm$ 0.02                   | 10                      | 2.26 $\pm$ na                     |
| 10.00           | 7.28 $\pm$ 0.03                   | 10.00           | 7.61 $\pm$ 0.02                   | 15                      | 2.26 $\pm$ 0.01                   |
| 12.00           | 7.27 $\pm$ 0.02                   | 12.00           | 7.61 $\pm$ 0.02                   | 30                      | 2.25 $\pm$ 0.01                   |
| 14.00           | 7.27 $\pm$ 0.02                   | 14.00           | 7.58 $\pm$ 0.03                   | 45                      | 2.26 $\pm$ 0.01                   |
| 16.00           | 7.28 $\pm$ 0.03                   | 16.00           | 7.58 $\pm$ 0.02                   | 60                      | 2.26 $\pm$ 0.01                   |
| 18.00           | 7.27 $\pm$ 0.02                   | 18.00           | 7.57 $\pm$ 0.01                   | 75                      | 2.28 $\pm$ 0.01                   |
| 20.00           | 7.21 $\pm$ 0.02                   | 20.00           | 7.56 $\pm$ 0.01                   | 90                      | 2.29 $\pm$ 0.01                   |
| Mean $\pm$ Std  | 7.27 $\pm$ 0.02                   | Mean $\pm$ Std  | 7.60 $\pm$ 0.03                   | Mean $\pm$ Std          | 2.26 $\pm$ 0.03                   |
| %RSD            | 0.34                              | %RSD            | 0.41                              | %RSD                    | 0.21                              |

na, not applicable: standard deviation (std) < 0.01.

**Table S1.** Evaluation of RP-UHPLC-CAD specificity based on comparing retention times in water ( $n = 3$ ).

| Glucose                 |                                   | Xylose                  |                                   | Arginine                |                                   |
|-------------------------|-----------------------------------|-------------------------|-----------------------------------|-------------------------|-----------------------------------|
| Conc.<br>(mg/L)         | Ret. time (min)<br>Mean $\pm$ std | Conc.<br>(mg/L)         | Ret. time (min)<br>Mean $\pm$ std | Conc.<br>( $\mu$ mol/L) | Ret. time (min)<br>Mean $\pm$ std |
| 1.5625 $\times 10^{-3}$ | 2.17 $\pm$ na                     | 1.5625 $\times 10^{-3}$ | 2.21 $\pm$ na                     | 0.025                   | 11.05 $\pm$ 0.01                  |
| 3.125 $\times 10^{-3}$  | 2.17 $\pm$ na                     | 3.125 $\times 10^{-3}$  | 2.21 $\pm$ na                     | 0.05                    | 11.06 $\pm$ 0.01                  |
| 6.25 $\times 10^{-3}$   | 2.17 $\pm$ na                     | 6.25 $\times 10^{-3}$   | 2.21 $\pm$ 0.01                   | 0.075                   | 11.06 $\pm$ 0.01                  |
| 0.0125                  | 2.17 $\pm$ na                     | 0.0125                  | 2.22 $\pm$ na                     | 0.10                    | 11.05 $\pm$ na                    |
| 0.025                   | 2.17 $\pm$ na                     | 0.025                   | 2.21 $\pm$ na                     | 0.25                    | 11.04 $\pm$ na                    |
| 0.05                    | 2.17 $\pm$ na                     | 0.05                    | 2.22 $\pm$ 0.01                   | 0.50                    | 11.03 $\pm$ na                    |
| 0.075                   | 2.18 $\pm$ na                     | 0.075                   | 2.22 $\pm$ 0.01                   | 0.75                    | 11.02 $\pm$ na                    |
| 0.1                     | 2.18 $\pm$ na                     | 0.1                     | 2.22 $\pm$ 0.01                   | 1.0                     | 11.01 $\pm$ 0.01                  |
| 0.2                     | 2.17 $\pm$ na                     | 0.2                     | 2.21 $\pm$ na                     | 2.5                     | 10.97 $\pm$ 0.01                  |
| 0.4                     | 2.18 $\pm$ na                     | 0.4                     | 2.22 $\pm$ na                     | 5.0                     | 10.91 $\pm$ na                    |

|            |           |            |             |            |              |
|------------|-----------|------------|-------------|------------|--------------|
| 0.6        | 2.18 ± na | 0.6        | 2.22 ± na   | 7.5        | 10.87 ± 0.01 |
| 0.8        | 2.17 ± na | 0.8        | 2.21 ± 0.01 | 10.0       | 10.84 ± na   |
| 1.0        | 2.17 ± na | 1.0        | 2.22 ± 0.01 | 12.5       | 10.80 ± na   |
| Mean ± std | 2.17 ± na | Mean ± std | 2.22 ± na   | Mean ± std | 10.97 ± 0.09 |
| %RSD       | 0.14      | %RSD       | 0.15        | %RSD       | 0.84         |

na, not applicable: standard deviation (std) < 0.01

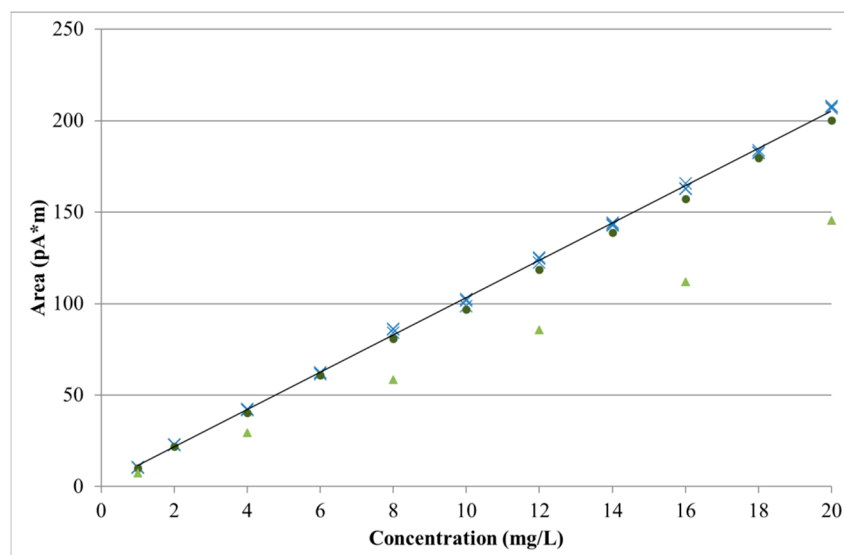

**Figure S1.** Calibration curve for glucose, and the effect of time and electrodes on the response using HPAEC-IPAD. Triplicates of standards analyzed within 24 h using the same new electrode (blue crosses) with the corresponding linear fitting curve (solid line); standards analyzed with another electrode: new (dark green circles) and after 43 h (green triangles) of continuous use.

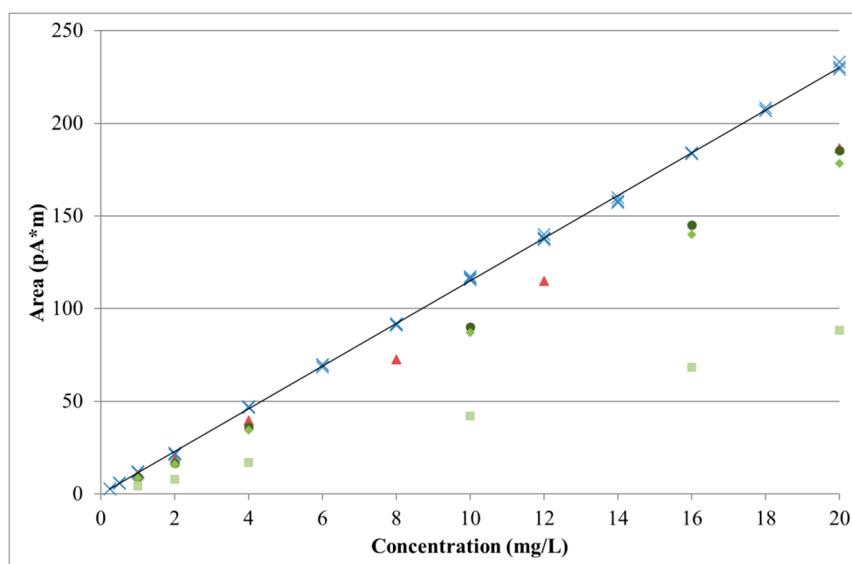

**Figure S2.** Calibration curve for xylose, and the effect of time and electrodes on the response using HPAEC-IPAD. Triplicates of standards analyzed within 24 h using the same new electrode (blue crosses) with the corresponding linear fitting curve (solid line); standards analyzed with another new electrode (red triangles); standards analyzed with a third electrode: new (dark green circles), after 14 h (green tilted squares), and after 35 h (light green squares) of continuous use.

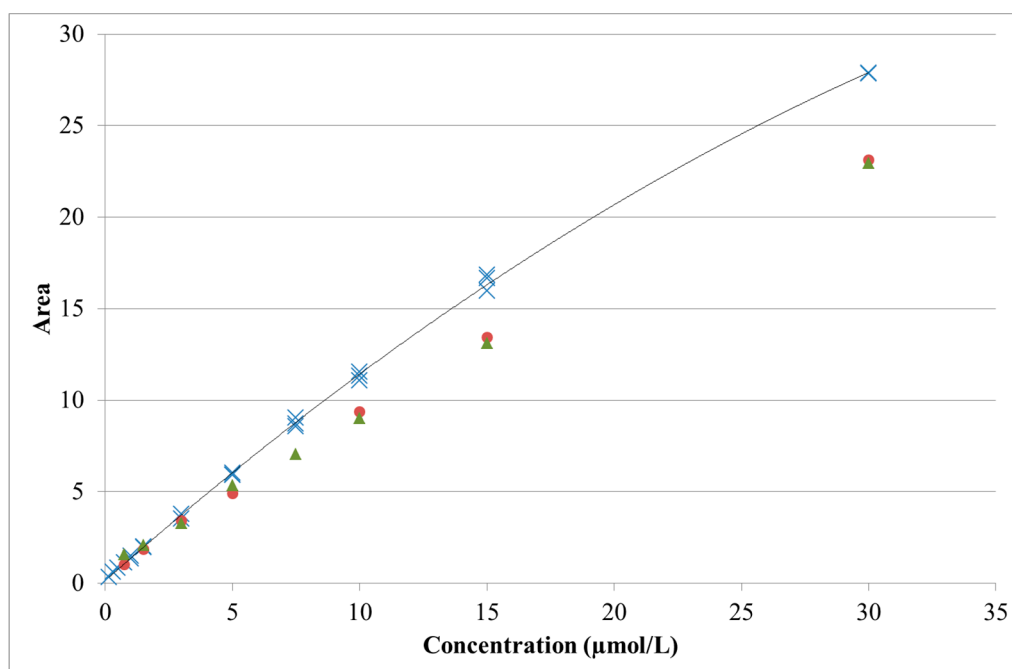

**Figure S3.** Calibration curve for arginine using HPAEC-IPAD. Triplicates of standards analyzed within 24 h using the same new electrode (blue crosses) with the corresponding quadratic fitting curve (solid line); standards analyzed with another new electrode (red circles); standards analyzed with a third new electrode (green triangles).

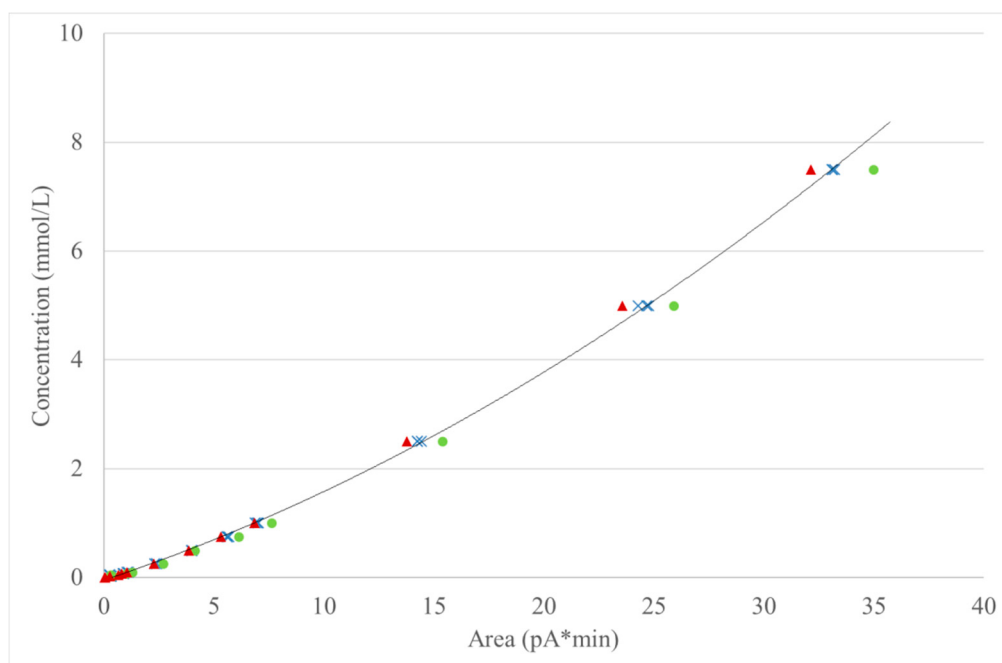

**Figure S4.** Calibration curve for arginine using RP-UHPLC-CAD. Triplicate standards analyzed within 24 h (blue crosses) with the corresponding quadratic fitting curve (solid line); standards analyzed one month later (green circles) and five months later (red triangles).

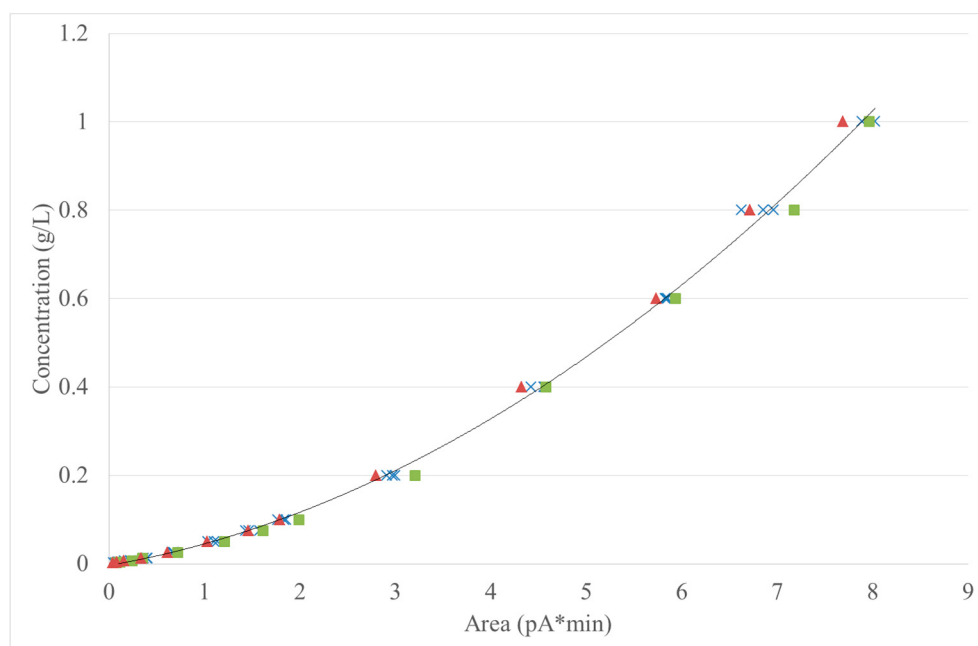

**Figure S5.** Calibration curve for glucose and effect of time on the response using RP-UHPLC-CAD. Triplicate standards analyzed within 24 h (blue crosses) with the corresponding quadratic fitting curve (solid line); standards analyzed one month later (green squares) and five months later (red triangles).

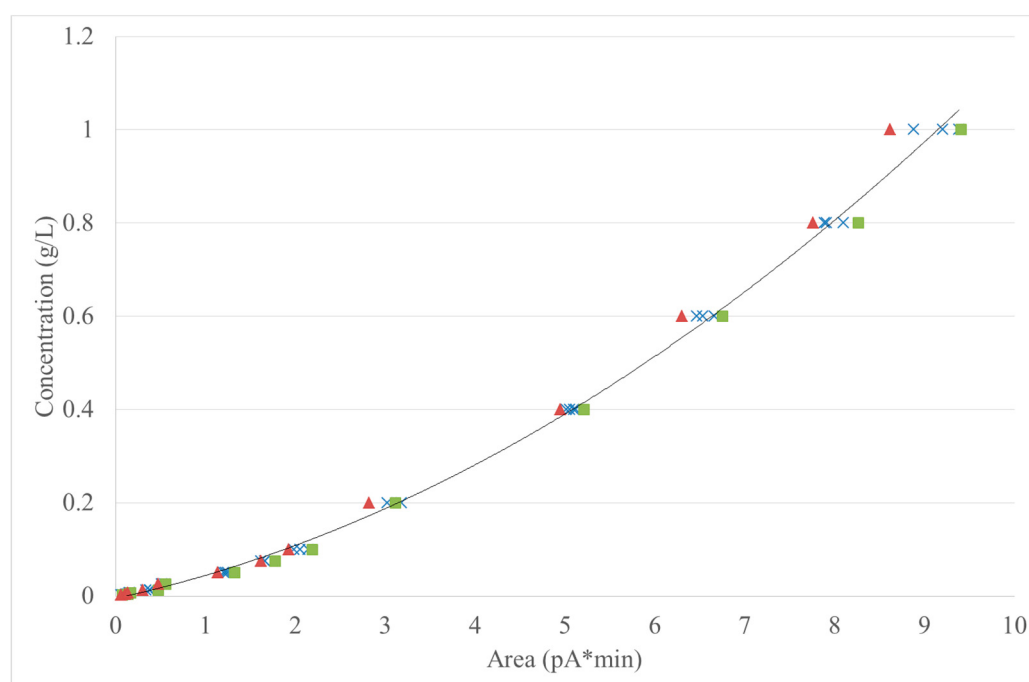

**Figure S6.** Calibration curve for xylose and effect of time on the response using RP-UHPLC-CAD. Triplicate standards analyzed within 24 h (blue crosses) with the corresponding quadratic fitting curve (solid line); standards analyzed one month later (red triangles) and five months later (green squares).

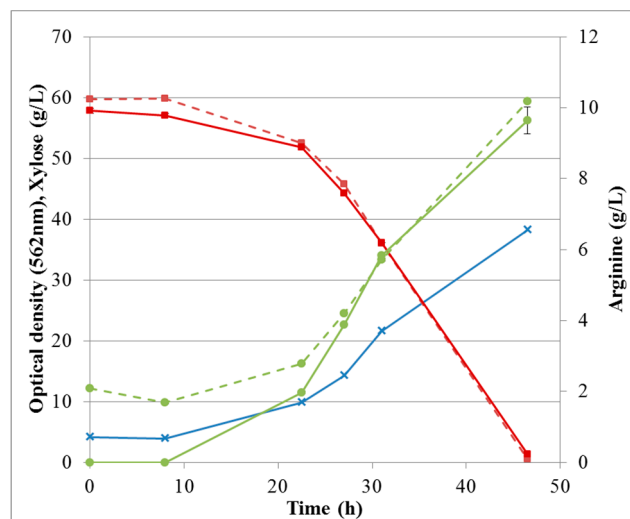

**Figure S7.** Fermentation profile: cell growth, xylose consumption, and arginine production in CSL. Optical density (blue crosses), xylose (red squares), and arginine (green circles) were determined using RP-UHPLC-CAD (solid lines) and HPAEC-IPAD (dashed lines). Standard deviations are omitted for clarity.
